# Supplementary material for: Near real-time forecasting for cholera decision making in Haiti after Hurricane Matthew
Source: PubMed Central journal article supplement (PMC5973636; doi:10.1371/journal.pcbi.1006127), 2018-05-16
Supplement: pcbi.1006127.s007.pdf [file pcbi.1006127.s007.pdf]

# Quasi real-time forecasting for cholera decision making in Haiti after Hurricane Matthew

Damiano Pasetto\*, Flavio Finger, Anton Camacho, Francesco Grandesso, Sandra Cohuet, Joseph Lemaitre, Andrew S. Azman, Francisco J. Luquero, Enrico Bertuzzo, Andrea Rinaldo

\* damiano.pasetto@epfl.ch

## S5 Appendix. Data sources

- Satellite-based daily precipitation measurements from October 2010 to March 2015: TRMM 3B42 RT Derived Daily Product,  
[https://disc2.gesdisc.eosdis.nasa.gov/dods/TRMM\\_3B42RT\\_Daily\\_7.info](https://disc2.gesdisc.eosdis.nasa.gov/dods/TRMM_3B42RT_Daily_7.info)
- GPM satellite-based precipitation measurements from April 2015 to December 2016: GPM level 3, IMERG late run  
[https://disc.gsfc.nasa.gov/datacollection/GPM\\_3IMERGDL\\_05.html](https://disc.gsfc.nasa.gov/datacollection/GPM_3IMERGDL_05.html)
- CFS precipitation forecasts of computed on days October 22-29 and November 05-12: CSF operational forecast, 6-hourly products  
<https://www.ncdc.noaa.gov/data-access/model-data/model-datasets/climate-forecast-system-version2-cfsv2>
- Population of Haitian communes: extracted from PHAO website  
[http://ais.paho.org/hip/viz/ed\\_haiticoleracases.asp](http://ais.paho.org/hip/viz/ed_haiticoleracases.asp)
- Road network: <https://www.openstreetmap.org>
- Departmental level cholera reported cases October 2010 - August 2016: extracted from the MSPP cholera reports, <http://mspp.gouv.ht>

- Cholera reported cases at communal level from September 2016 to December 2016): online dashboard of EPICENTRE 17  
18  
<https://epicentre-msf.shinyapps.io/haiti-2016-cholera/> 19
